# Supplementary material
Source: HighWire-hosted journal article supplement (https://care.diabetesjournals.org/content/suppl/2007/11/13/dc07-1452)
Supplement: dc071452OnlineFigure1.pdf [file dc071452OnlineFigure1.pdf]

|                                                                                                                                                            |                                                        |       |       |
|------------------------------------------------------------------------------------------------------------------------------------------------------------|--------------------------------------------------------|-------|-------|
| 33,357 Patients Randomized                                                                                                                                 |                                                        |       |       |
| Excluded from analyses: 15,842 participants<br>Participants with diabetes at baseline: 13,168<br>Undetermined metabolic syndrome status at baseline: 2,674 |                                                        |       |       |
| N = 17,515                                                                                                                                                 |                                                        |       |       |
| Status at study closeout <sup>1</sup> :                                                                                                                    |                                                        |       |       |
|                                                                                                                                                            | Chlorthalidone, Amlodipine, and Lisinopril comparisons |       |       |
|                                                                                                                                                            | Chlor                                                  | Amlod | Lisin |
| N                                                                                                                                                          | 8,046                                                  | 4,707 | 4,762 |
| Observed/expected person-years, %                                                                                                                          | 99%                                                    | 99%   | 99%   |
| Known Alive                                                                                                                                                | 6,771                                                  | 3,980 | 3,996 |
| Confirmed Dead                                                                                                                                             | 1,022                                                  | 573   | 631   |
| Dead Pending Confirmation                                                                                                                                  | 33                                                     | 28    | 27    |
| Lost to follow-up                                                                                                                                          | 171                                                    | 101   | 106   |
| 17,515 included in analyses                                                                                                                                |                                                        |       |       |

<sup>1</sup> Numbers are as of September 2002.
